# Supplementary material for: A natural polymer based bioadhesive with self-healing behavior and improved antibacterial properties
Source: Royal Society of Chemistry journal article supplement (doi:10.1039/d0bm00624f), 2020-01-01
Supplement: d0bm00624f1.pdf [file d0bm00624f1.pdf]

## Supporting Information

### Natural polymer based bioadhesive with self-healing behavior and improved antibacterial properties

Xiang Ke,<sup>a</sup> Zhiyun Dong,<sup>a</sup> Shuxian Tang,<sup>a</sup> Wenlin Chu,<sup>a</sup> Xiaoran Zheng,<sup>a</sup> Li Zhen,<sup>b</sup> Xingyu Chen,<sup>c</sup>  
Chunmei Ding,<sup>a</sup> Jun Luo<sup>\*a</sup> and Jianshu Li<sup>\*a</sup>

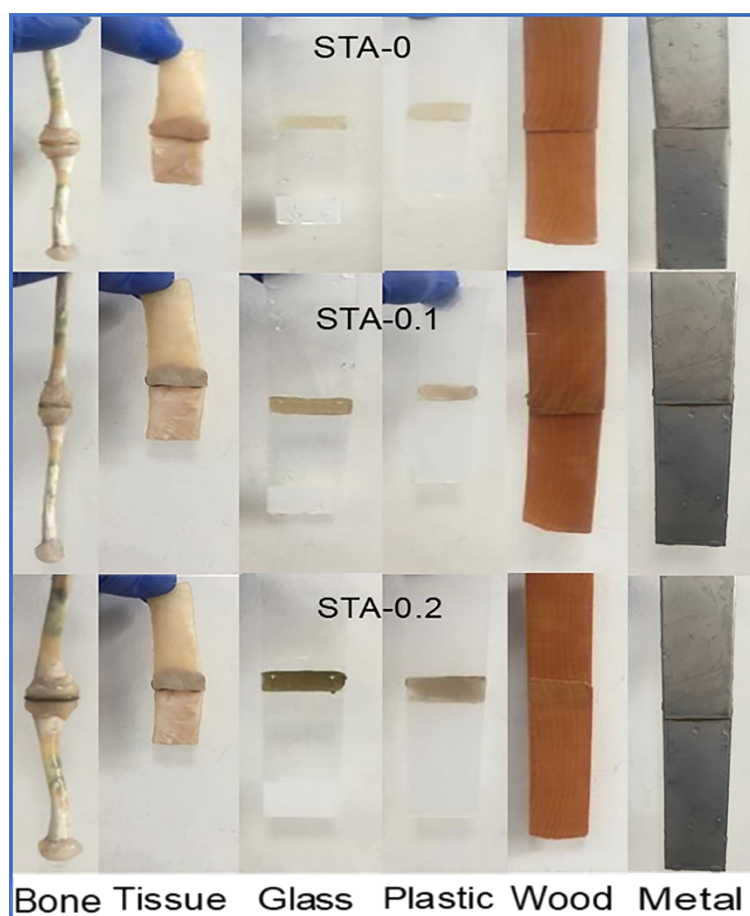

Figure S1 The universal adhesion ability of STA hydrogel adhesive (group STA-0, STA-0.1, and STA-0.2 were chosen as examples).

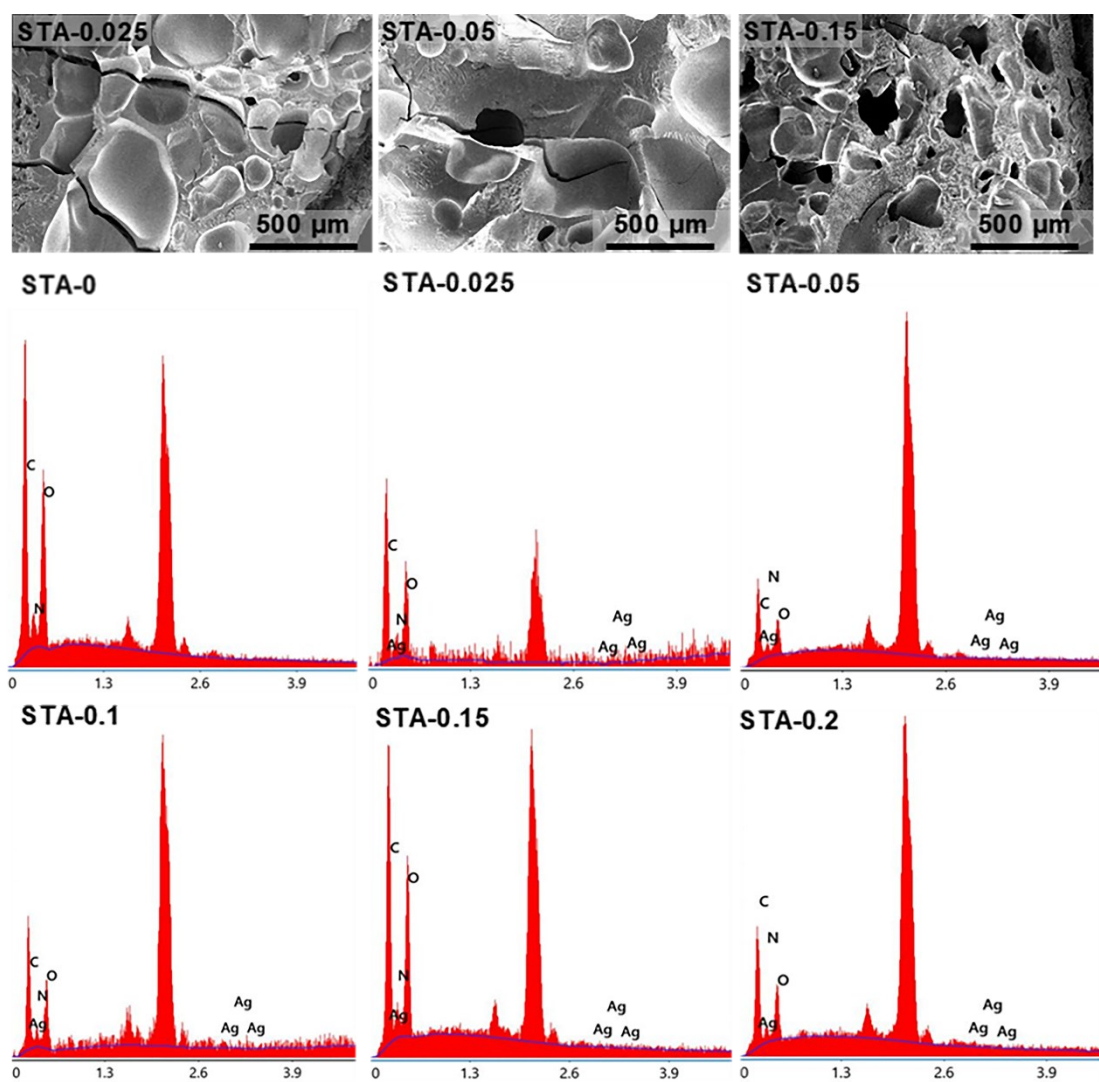

Figure S2 The SEM images of different STA hydrogel adhesives and EDS spectrum of different STA hydrogel adhesives.

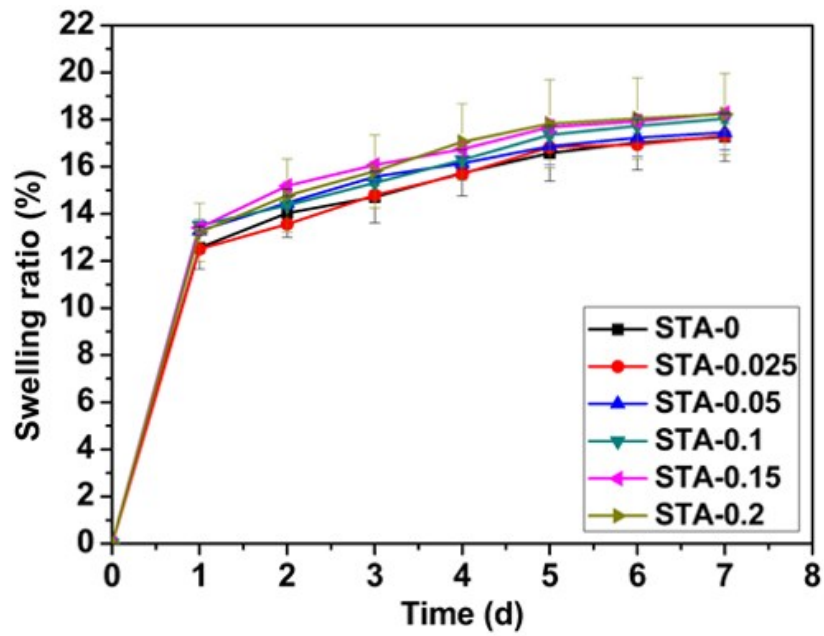

Figure S3 The swelling ratios of different STA hydrogel adhesives in PBS (pH=7.2) at room temperature. Data are presented as mean  $\pm$  SD (n = 4).

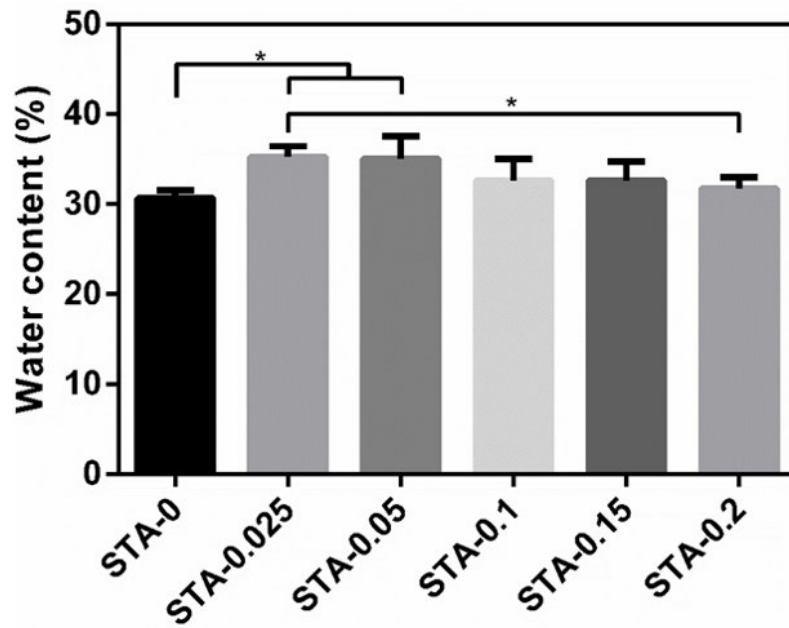

Figure S4 The water content of different STA hydrogel adhesives. Data are presented as the mean  $\pm$  SD with \* p < 0.05 (n = 4).
